# Supplementary material for: Epidemiology of Malnutrition among Children with Cerebral Palsy in Low- and Middle-Income Countries: Findings from the Global LMIC CP Register
Source: MDPI journal article supplement (doi:10.3390/nu13113676), 2021-10-20
Supplement: s1 [file s1]

## Supplementary files

**Supplementary Table S1:** Assessment of anthropometric measurements

| Anthropometric measurements                |            | Methods                                                                                                                                                                                                                                                                                                                                                                                                                                                                                                                                                                                                                                                  |
|--------------------------------------------|------------|----------------------------------------------------------------------------------------------------------------------------------------------------------------------------------------------------------------------------------------------------------------------------------------------------------------------------------------------------------------------------------------------------------------------------------------------------------------------------------------------------------------------------------------------------------------------------------------------------------------------------------------------------------|
| <i>Weight</i>                              |            | Weight was measured in kilograms using digital weighing scale with a precision of 100 grams. For young children and children who could not stand independently, we documented the tare weight where, at first the weight of primary/accompanying caregiver of the child is measured (i.e. Wcaregiver), then combined weight of the child with their primary/accompanying caregiver is measured (i.e. Wcaregiver + Wchild). Weight of the child is calculated using following formula; $W_{child} = (W_{caregiver} + W_{child}) - (W_{caregiver})$ . The standard procedure for weight measurements were followed (e.g. bare feet, minimum clothing). [1] |
| <i>Length/Height:</i>                      |            | For young children aged <2 years, we measured the length using a length board. For children aged ≥2 years we measured the height using height scale. If length/height could not be measured due to severe physical impairment, we measured the knee height using a measuring tape which was then converted to full height using the following formula: $Height = 2.69 \times \text{knee height} + 24.2$ . [2] All measurements (i.e. length/height/knee height) were collected in centimeters following standard procedure. [1]                                                                                                                          |
| <i>Mid-Upper Arm Circumference (MUAC):</i> | <i>Arm</i> | MUAC was measured in centimeters for children aged less than 61 months at assessment using a MUAC tape following standard procedure. [1]                                                                                                                                                                                                                                                                                                                                                                                                                                                                                                                 |

## References

1. WHO. Training course of Child Growth Assessment; WHO: China, 2008.
2. Stevenson, R.D. Use of segmental measures to estimate stature in children with cerebral palsy. Archives of pediatrics & adolescent medicine 1995, 149, 658–662

**Supplementary Table S2: Nutritional status of children aged five years or less**

| Nutritional indicator                 | Bangladesh                      |                                     | Indonesia                     |                                     | Nepal                         |                                     | Ghana                          |                                     |
|---------------------------------------|---------------------------------|-------------------------------------|-------------------------------|-------------------------------------|-------------------------------|-------------------------------------|--------------------------------|-------------------------------------|
|                                       | Children with CP, n=1015, n (%) | National average <sup>1</sup> n (%) | Children with CP, n=37, n (%) | National average <sup>2</sup> n (%) | Children with CP, n=28, n (%) | National average <sup>3</sup> n (%) | Children with CP, n=226, n (%) | National average <sup>4</sup> n (%) |
| <b>Weight-for-age <sup>5</sup></b>    |                                 |                                     |                               |                                     |                               |                                     |                                |                                     |
| Normal                                | 292 (29.5)                      | N/A                                 | 7 (18.9)                      | N/A                                 | 16 (61.5)                     | N/A                                 | 117 (56.3)                     | N/A                                 |
| Underweight                           | 698 (70.5)                      | 21.9                                | 30 (81.1)                     | N/A                                 | 10 (38.5)                     | 27.0                                | 91 (43.8)                      | 11.0                                |
| <b>Height-for-age <sup>5</sup></b>    |                                 |                                     |                               |                                     |                               |                                     |                                |                                     |
| Normal                                | 187 (19.3)                      | N/A                                 | 3 (8.3)                       | N/A                                 | 9 (39.1)                      | N/A                                 | 102 (50.0)                     | N/A                                 |
| Stunted                               | 782 (80.7)                      | 30.8                                | 33 (91.7)                     | N/A                                 | 14 (60.9)                     | 35.8                                | 102 (50.0)                     | 18.8                                |
| <b>Weight-for-height <sup>5</sup></b> |                                 |                                     |                               |                                     |                               |                                     |                                |                                     |
| Normal                                | 587 (64.9)                      | N/A                                 | 18 (69.2)                     | N/A                                 | 19 (82.6)                     | N/A                                 | 106 (60.9)                     | N/A                                 |
| Wasted                                | 317 (35.1)                      | 8.4                                 | 8 (30.8)                      | N/A                                 | 4 (17.4)                      | 9.7                                 | 68 (39.1)                      | 4.7                                 |
| <b>MUAC-for-age <sup>5</sup></b>      |                                 |                                     |                               |                                     |                               |                                     |                                |                                     |
| Normal                                | 723 (73.6)                      | N/A                                 | 27 (73.0)                     | N/A                                 | 18 (72.0)                     | N/A                                 | 107 (58.2)                     | N/A                                 |
| Wasted                                | 260 (26.4)                      | N/A                                 | 10 (27.0)                     | N/A                                 | 7 (28.0)                      | N/A                                 | 77 (41.8)                      | N/A                                 |

<sup>1</sup> Bangladesh Demographic and Health Survey 2018; <sup>2</sup> Not available (N/A); <sup>3</sup> Nepal Demographic and Health Survey 2016; <sup>4</sup> Ghana Demographic and Health Survey 2014; <sup>5</sup> missing data; <sup>6</sup> z score > +2SD were excluded from the analysis

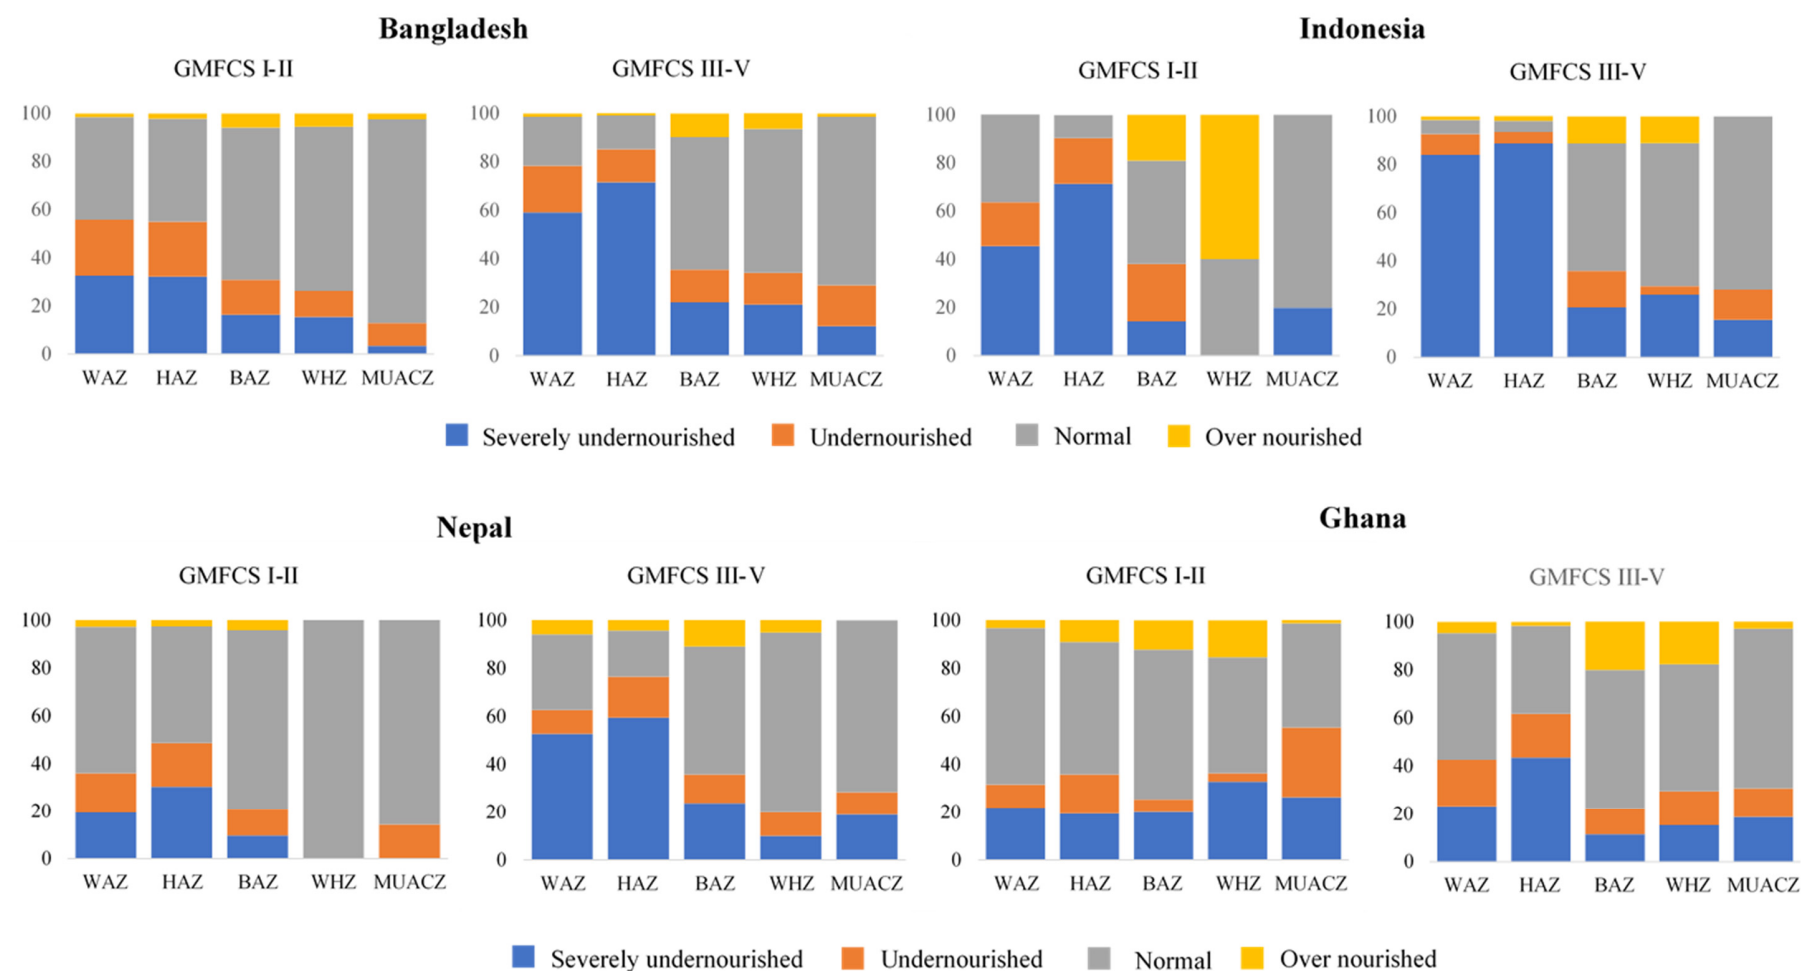

**Supplementary Figure S1:** Nutritional status of children with CP according to their GMFCS level
